# Supplementary material for: Changes in Bacterioplankton Communities Resulting From Direct and Indirect Interactions With Trace Metal Gradients in an Urbanized Marine Coastal Area
Source: PubMed Central journal article supplement (PMC6395402; doi:10.3389/fmicb.2019.00257), 2019-02-22
Supplement: Data_Sheet_1.pdf [file Data_Sheet_1.pdf]

## Supplementary Information

### **Changes in bacterioplankton communities resulting from direct and indirect interactions with trace metal gradients in an urbanized marine coastal area**

Clément Coclet<sup>1,2</sup>, Cédric Garnier<sup>1</sup>, Gaël Durrieu<sup>1</sup>, Dario Omanović<sup>3</sup>, Sébastien D'onofrio<sup>1</sup>,  
Christophe Le Poupon<sup>1</sup>, Mullot Jean-Ulrich<sup>4</sup>, Jean-François Briand<sup>2</sup>, Benjamin Misson<sup>1,\*</sup>

<sup>1</sup> *Université de Toulon, Aix Marseille Université, CNRS, IRD, Mediterranean Institute of Oceanography (MIO), UM110, France.*

<sup>2</sup> *Université de Toulon, MAPIEM, EA 4323, Toulon, France.*

<sup>3</sup> *Ruđer Bošković Institute, Division for Marine and Environmental Research, Bijenička 54, Zagreb, Croatia.*

<sup>4</sup> *LASEM-Toulon, Base Navale De Toulon, BP 61, 83800 Toulon, France.*

\*: corresponding author; email: [mission@univ-tln.fr](mailto:mission@univ-tln.fr); tel: +33 494 146 746; Université de Toulon, CS60584, 83041 Toulon Cedex 9

## 1. Supplementary Material

### **Environmental parameters.**

A description of the pre-cleaning protocol, the storage and the measurement of nutrients (dissolved organic carbon: DOC ( $\text{mgC.L}^{-1}$ ), total nitrogen: TN, and nitrate:  $\text{NO}_3^-$  ( $\text{mgN.L}^{-1}$ )) and dissolved trace metal (Cd, Co, Cu, Ni, Pb and Zn) (nM) concentrations is detailed in Coclet et al. (2017). Additionally, Trace metal concentrations in seawater samples were analysed also by HR ICP-MS (Element 2, Thermo Finnigan; at IRB, Zagreb). Measurements were performed after dilution of the samples in a 2 %  $\text{HNO}_3$  solution (dilution factor 10) spiked with a stock solution of indium as an internal standard (final concentration:  $10 \mu\text{g/L}$ ). Standards of elements were prepared in the matrix matching media (UWSV, 2 %  $\text{HNO}_3$ ) for the assessment of element concentration by means of external calibration. Phosphate concentrations ( $\text{PO}_4^{3-}$ ,  $\text{mgP.L}^{-1}$ ) were determined using a UV 1800 Shimadzu Spectrophotometer and micro cell Quartz SUPRASIL®, 50-mm light path (Hellma Analytics), based on the Rimmelin and Moutin (2005) MAGnesium Induced Coprecipitation (MAGIC) method.

**DNA extraction, PCR amplification and sequencing preparation.** Nucleic acids were extracted by a combination of mechanic and enzymatic cell lysis techniques applied directly to polycarbonate membrane filters using lysis solution (50 nM glucose, 10 nM EDTA, 25 nM Tris pH 8.0), followed by consecutive incubations with lysozyme ( $20 \text{ mg.mL}^{-1}$ ,  $37^\circ\text{C}$ , 45 min) and SDS 10% with proteinase K ( $20 \text{ mg.mL}^{-1}$ ,  $55^\circ\text{C}$ , 60 min). DNA was purified using AllPrep DNA/RNA Mini Kit (QIAGEN) according to the manufacturer's instructions (Ghiglione et al., 2009). DNA concentration was measured using a NanoDrop ND-100.

Microbial communities were characterized using a dual index sequencing approach with primers targeting the V4 region of the bacterial and archaeal 16S rRNA genes. The primer construct consisted of a six-base barcode and the 16S forward primer 515Y (GTGYCAGCMGCCGCGGTAA) and the 16S reverse 926R (CCGYCAATTYMTTTRAGTTT) (Parada et al., 2016). PCR reactions were carried out in a 25  $\mu$ L reaction mixture composed of DNA sample, GoTaq® Long PCR Master Mix (PROMEGA, France), and 0.1  $\mu$ M of each primer. PCR reactions were thermo-cycled using the following protocol: 95 °C for 2 min; and 30 cycles at 95 °C for 30 s, 56 °C for 30 s and 72 °C for 90 s; with a final extension at 72 °C for 10 min. PCR products were then purified with AMPure XP beads (Agencourt Bioscience) and quantified by Quant-iT™ PicoGreen™ dsDNA Reagent (Life Technologies) as described by the manufacturer's instructions. Purified products from samples were pooled in equimolar concentrations. In total, 52 libraries were paired-end ( $2 \times 250$ bp) sequenced on the MiSeq (Illumina) at Genoscreen (Lille, France).

**Redundancy analysis.** To investigate the overall effects of abiotic parameters on BCC, we performed Spearman rank correlation analysis and redundancy analysis (RDA) of the relative taxon abundances as well as of the relative functional group abundances, against 31 explanatory variables: temperature, salinity, chlorophyll *a*, DOC, TN (Fig S1), dissolved oxygen ( $\text{mg}\cdot\text{L}^{-1}$  and %), pH, eukaryotic phytoplankton (pico- and nanoeukaryotes) abundances (Table S3), dissolved Cd, Cu, Pb and Zn (Fig S2), and the 17 chemical elements from Table S2. Prior to the RDA, the “ordiR2step” function in Vegan (Oksanen et al., 2012) was used to automatically select constraints in the model using forward stepwise selection and Akaike's information criterion with 999 permutation tests at each step. We repeated the forward stepwise selection with the bacterial community from each sampling site. Among the 31 explanatory variables, 20 significant variables ( $P < 0.05$ ) were kept for the following

analyses. To evaluate the significance of the redundancy axes, we used an ANOVA test for RDA with Monte Carlo permutation test (999 permutations). Variation partitioning was used to evaluate whether pure trace metal variables affected the BCC independently of the effect of other variables (Oksanen et al., 2012). In Dang et al. (2015), the geochemical analysis of Toulon Bay revealed that three-main groups were clearly identified: (i) marine elements (with Sr, notably), (ii) contaminants and (iii) terrigenous elements. Based on this study, all significant explanatory variables were divided into four groups. Thus, firstly, we separated the ‘pure contaminants’ (A) effect as referring to the trace metals, Ba, Cd, Cu, Pb, Zn, Mn. Secondly, we separated “terrigenous elements” (B) (Li, Rb, Cs, Al and Fe) and “nutrient and biotic variables” (C) (DOC, TN, chlorophyll *a*, picoeukaryote and nanoeukaryote densities). Thirdly, we generated a set of variables related to “other variables” as ‘marine tracers’ (D) (V, Sr, Temperature and Salinity). Each group of explanatory variables was tested independently as well as in combination. To verify the robustness of our results for various taxonomic resolutions, we considered the taxonomic composition at the OTU, genus, family, order, class and phylum level.

## 2. Supplementary Figures

**Fig. S1** Map of the studied site Toulon Bay with the location of the sampling sites. Solid and dashed lines represent a seawall and treated sewage submarine outlets, respectively.

**Fig. S2** Dynamics of dissolved trace metals concentrations in bottom seawater at the different sampling stations. Symbols and errors bars represent average and standard error ( $n = 3$ ), respectively.

**Fig. S3** Nonmetric dimensional scaling (nMDS) ordination based on Bray-Curtis dissimilarity for explanatory variables (temperature, salinity, chlorophyll a, DOC, TN, dissolved oxygen ( $\text{mg}\cdot\text{L}^{-1}$  and %), pH, pico- and nanoeukaryotes abundances dissolved Cd, Cu, Pb and Zn, and the 17 chemical elements from Table S2) between the different sampling sites (A), sampling date (B), and sampling depth (C). Each symbol corresponds to a distinct site, time and depth point.

**Fig. S4** Temporal dynamics of environmental variables of June 2015 in both surface (left panel) and bottom (right panel) seawater samples. Symbols and errors bars in both Dissolved organic carbon and Total nitrogen plots represent average and standard error ( $n = 3$ ), respectively.

**Fig. S5** Dynamics of heterotrophic prokaryotes in surface (A) and bottom (B) seawater at the different sampling stations.

**Fig. S6** Box-plot of the Observed OTUs, Chao1, Shannon Simpson and Equitability indices for each sampling sites (i.e. 6ext, MIS, Pt12, Pt15 and 41p) calculated from the 36 remaining samples. Upper and lower lines correspond to the first and third quartile of the distribution of values. The median values are shown with horizontal black wide lines. Outliers are displayed as dots.

**Fig. S7** Co-occurrence global network and sub-networks according to MCODE analysis of bacterial taxa and environmental variables derived from the OTU table and showing only statistically significant correlations. Node size correspond to the relative abundance of the OTU. Nodes colors correspond to main bacterioplankton classes. Green and red lines represent positive and negative correlations, respectively.

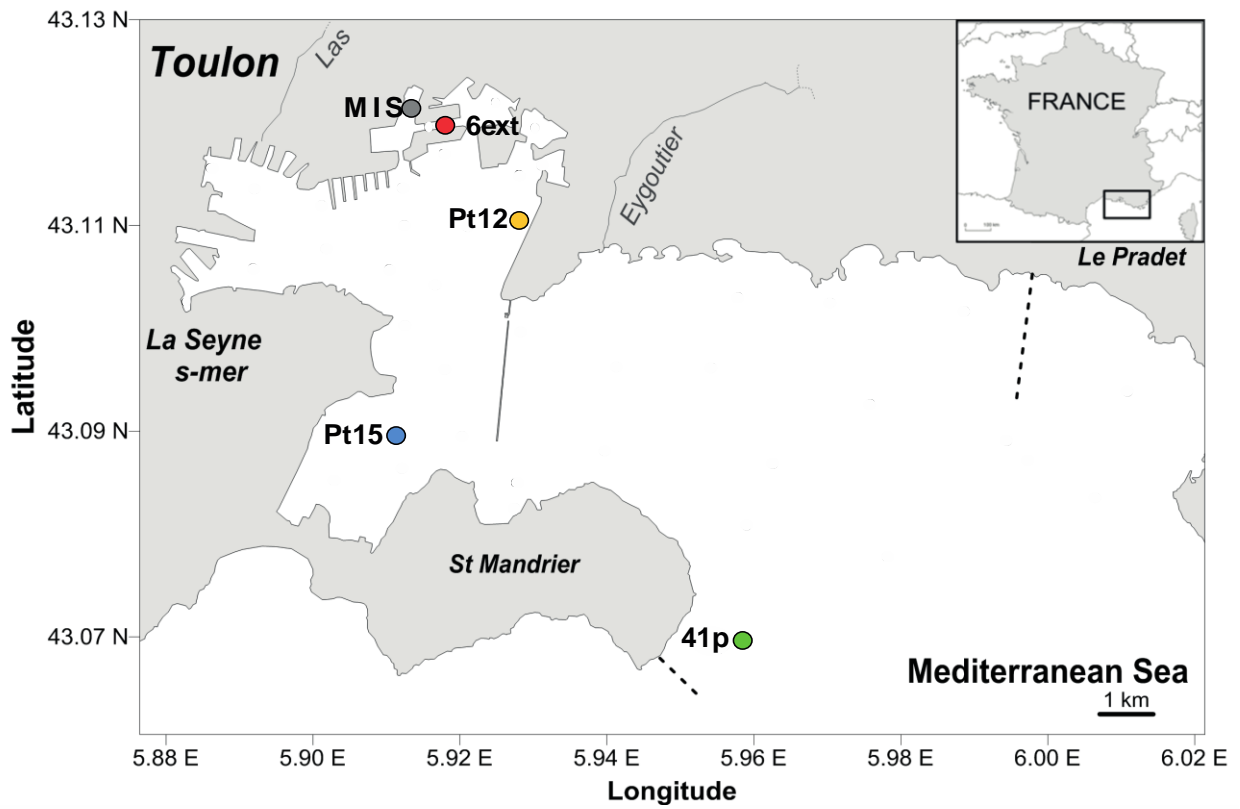

**Fig. S1** Map of the studied site Toulon Bay with the location of the sampling sites. Solid and dashed lines represent a seawall and treated sewage submarine outlets, respectively.

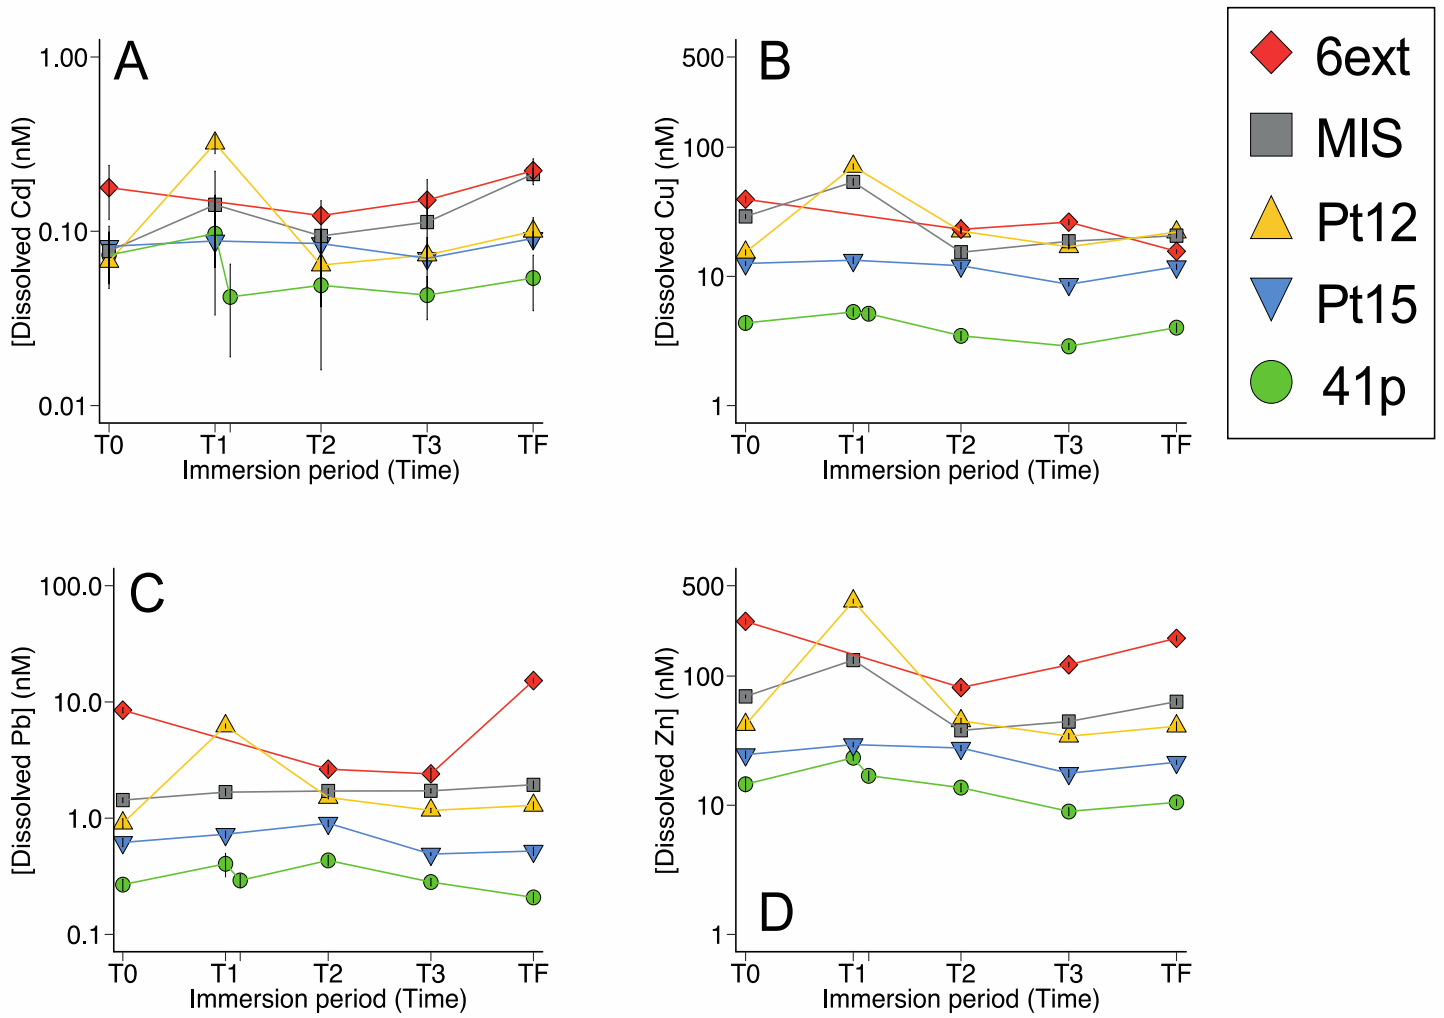

**Fig. S2** Dynamics of dissolved trace metals concentrations in bottom seawater at the different sampling stations. Symbols and errors bars represent average and standard error ( $n = 3$ ), respectively.



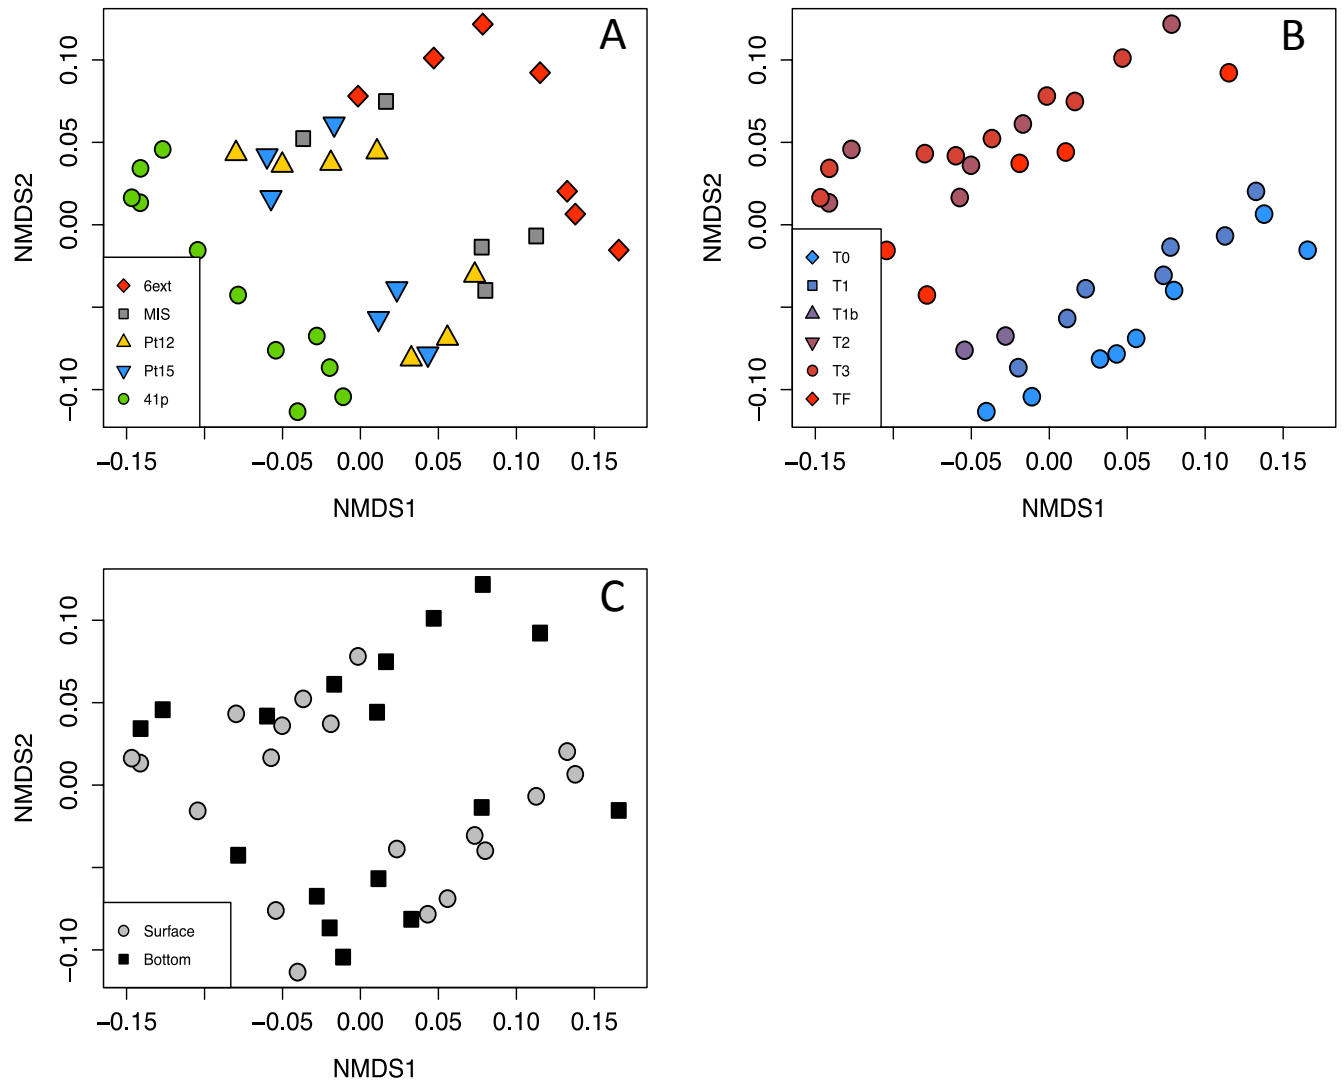

**Fig. S3** Nonmetric dimensional scaling (nMDS) ordination based on Bray-Curtis dissimilarity for explanatory variables (temperature, salinity, chlorophyll a, DOC, TN, dissolved oxygen (mg.L-1 and %), pH, pico- and nanoeukaryotes abundances dissolved Cd, Cu, Pb and Zn, and the 17 chemical elements from Table S2) between the different sampling sites (A), sampling date (B), and sampling depth (C). Each symbol corresponds to a distinct site, time and depth point.

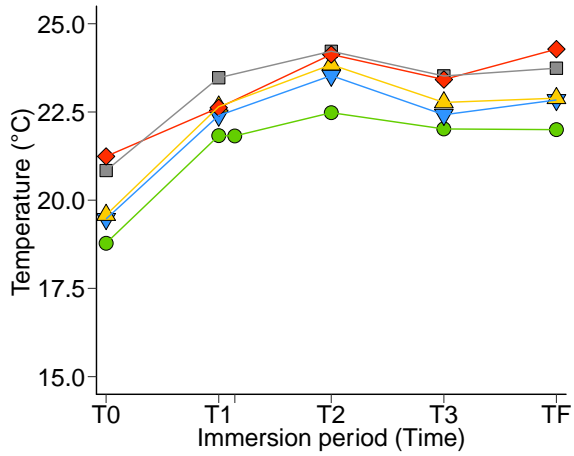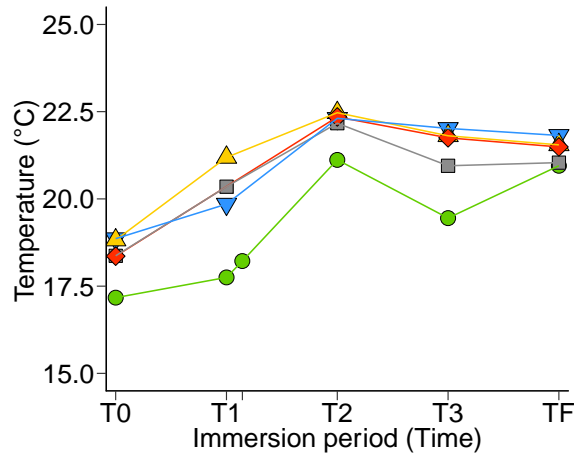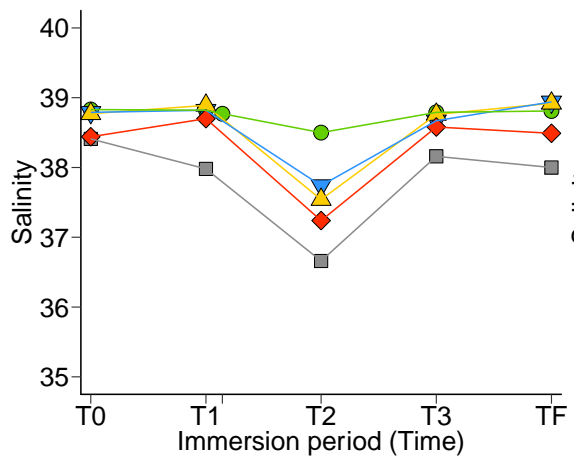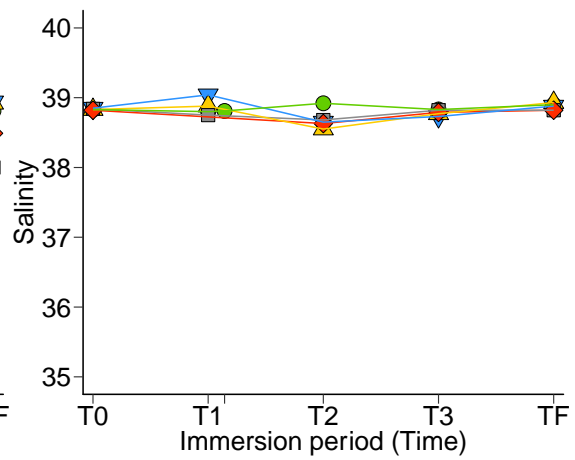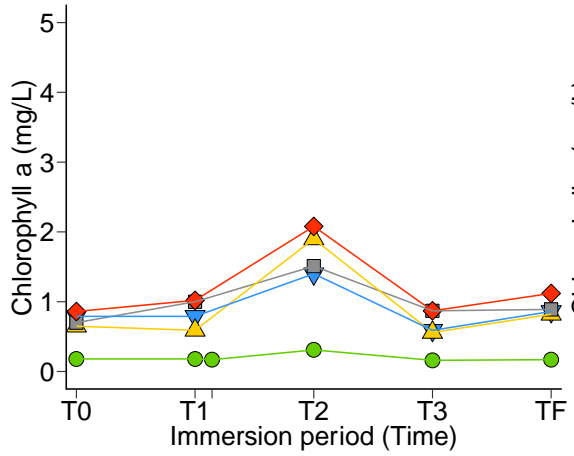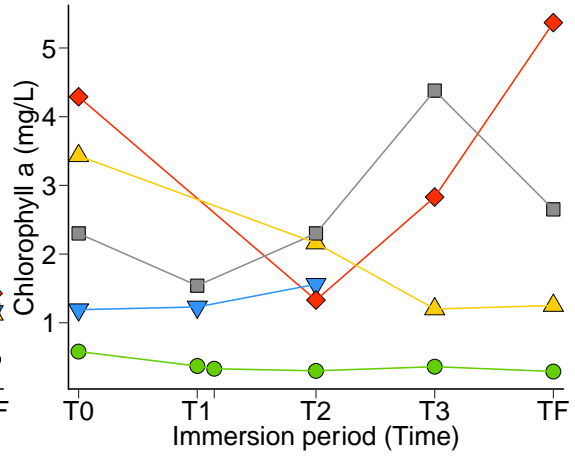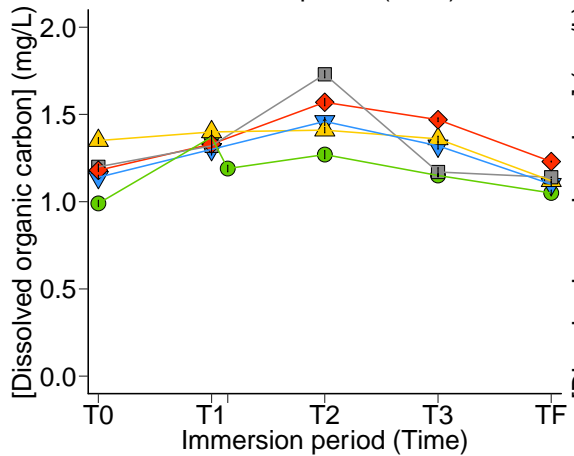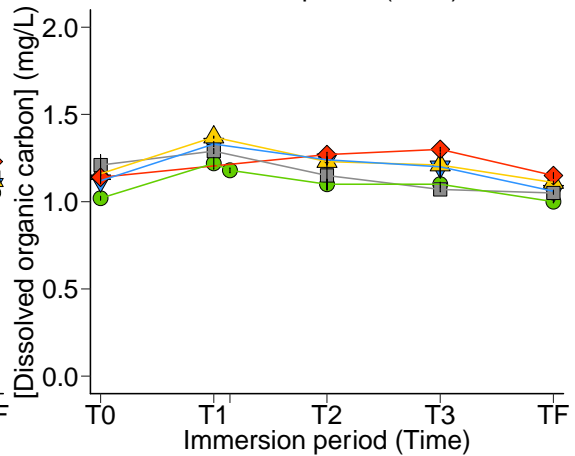

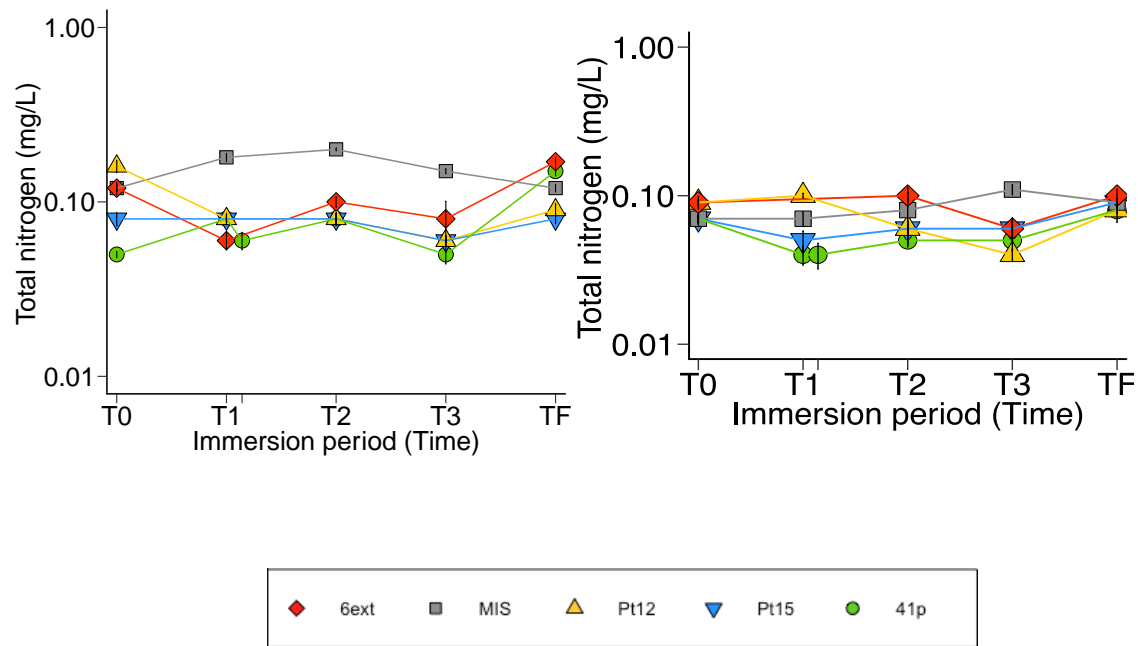

**Fig. S4** Temporal dynamics of environmental variables of June 2015 in both surface (left panel) and bottom (right panel) seawater samples. Symbols and errors bars in both Dissolved organic carbon and Total nitrogen plots represent average and standard error ( $n = 3$ ), respectively.

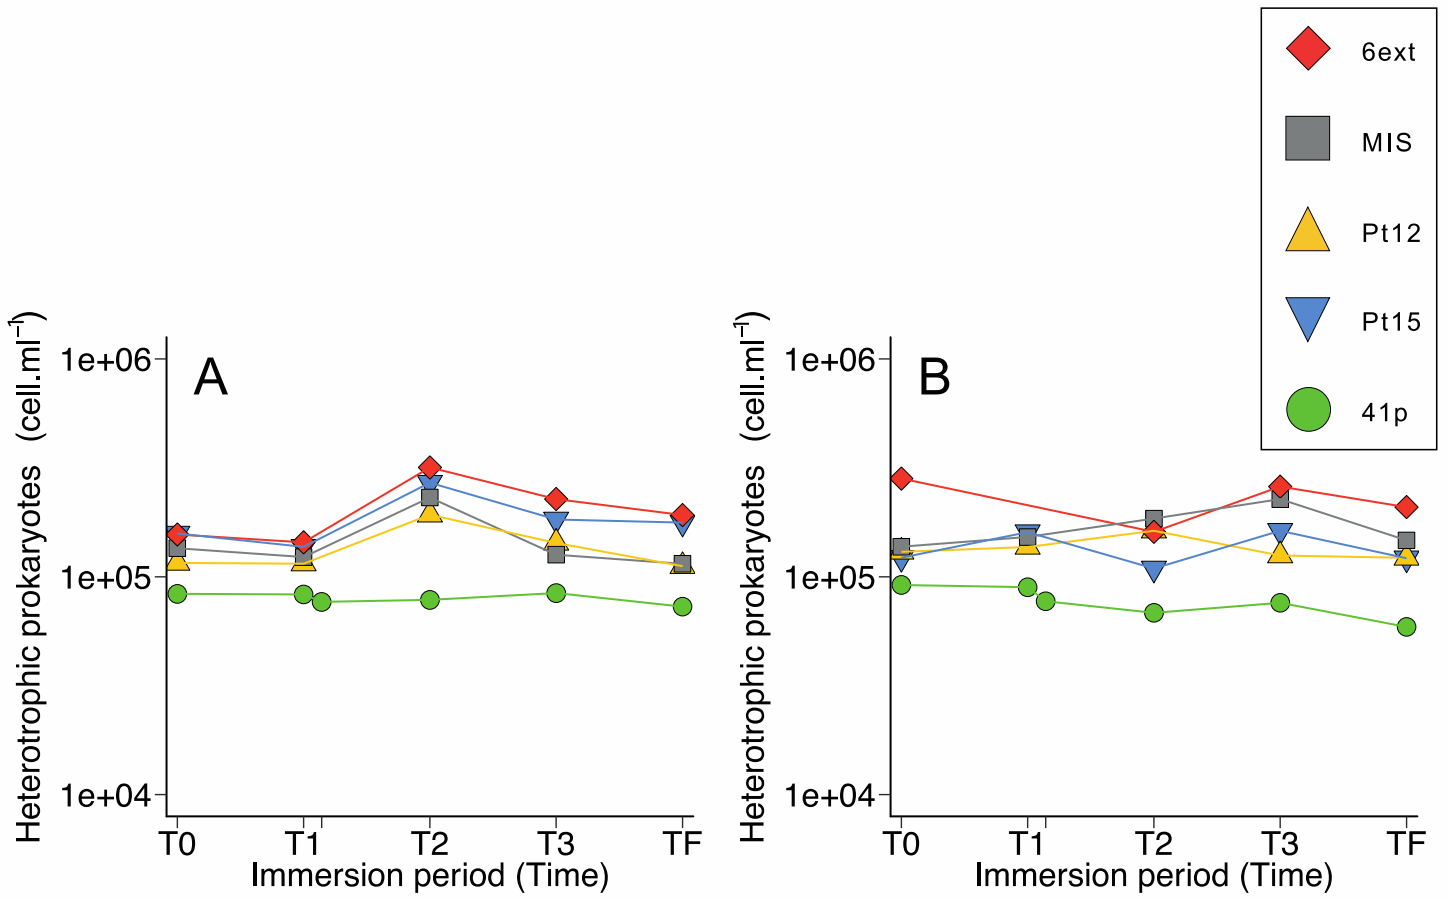

**Fig. S5** Dynamics of heterotrophic prokaryotes in surface (A) and bottom (B) seawater at the different sampling stations.

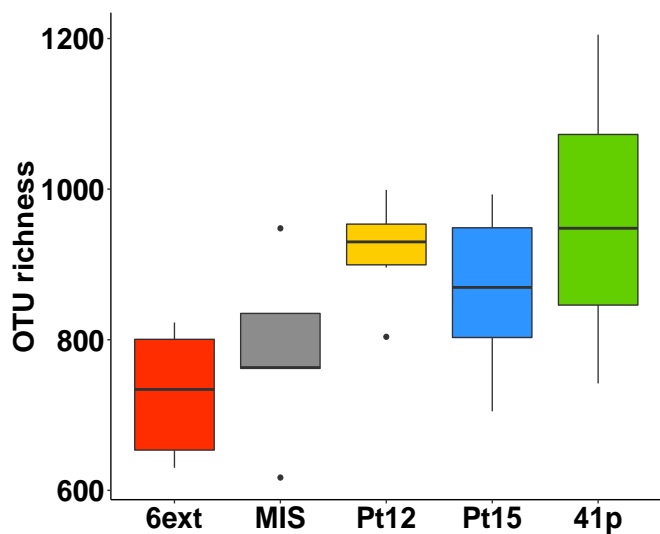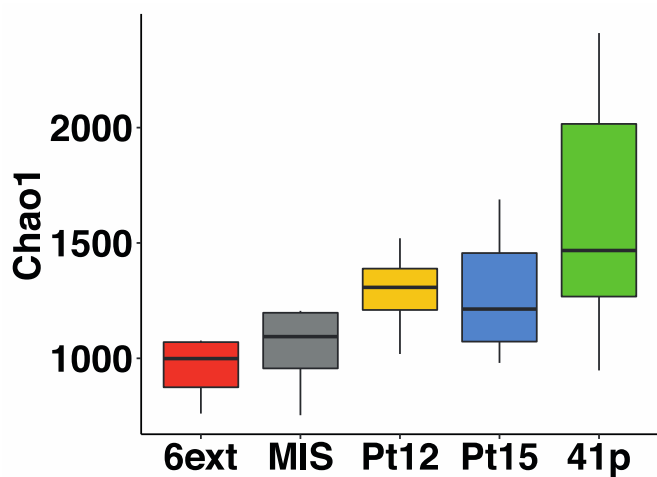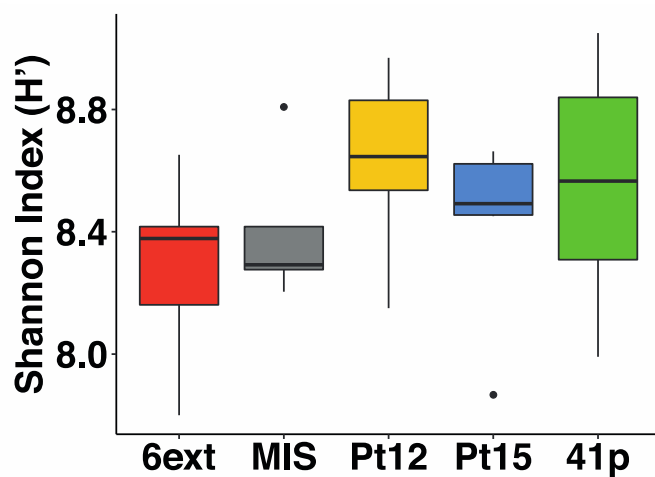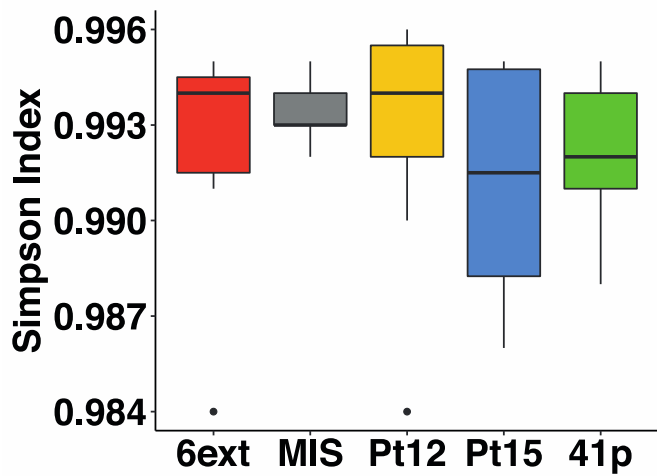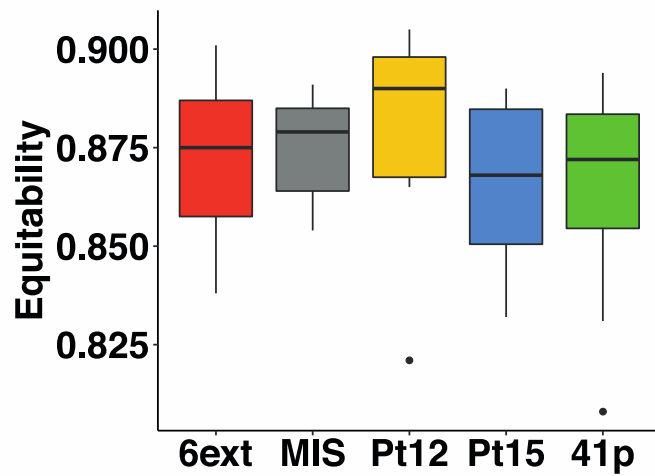

**Fig. S6** Box-plot of the Observed OTUs, Chao1, Shannon Simpson and Equitability indices for each sampling sites (i.e. 6ext, MIS, Pt12, Pt15 and 41p) calculated from the 36 remaining samples. Upper and lower lines correspond to the first and third quartile of the distribution of values. The median values are shown with horizontal black wide lines. Outliers are displayed as dots.

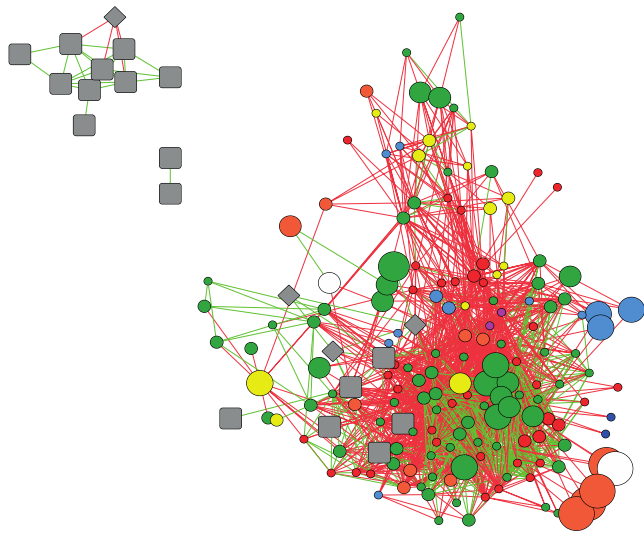

Global network

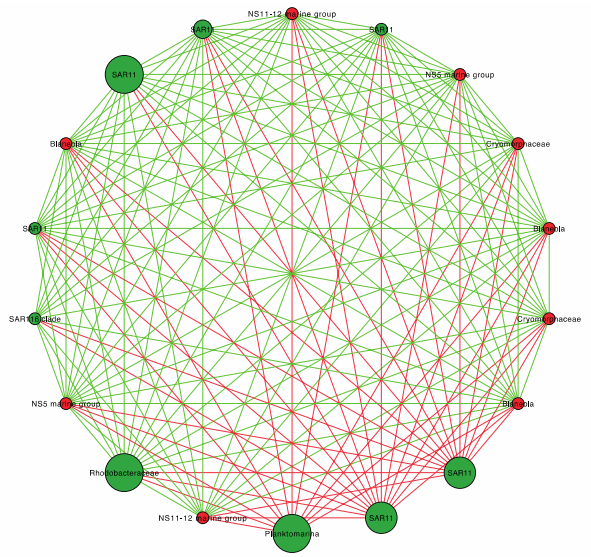

Cluster 1

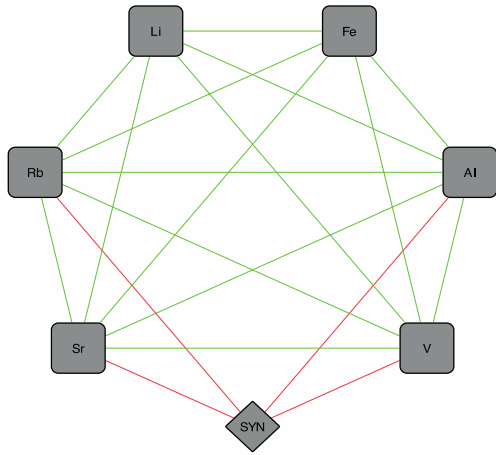

Cluster 2

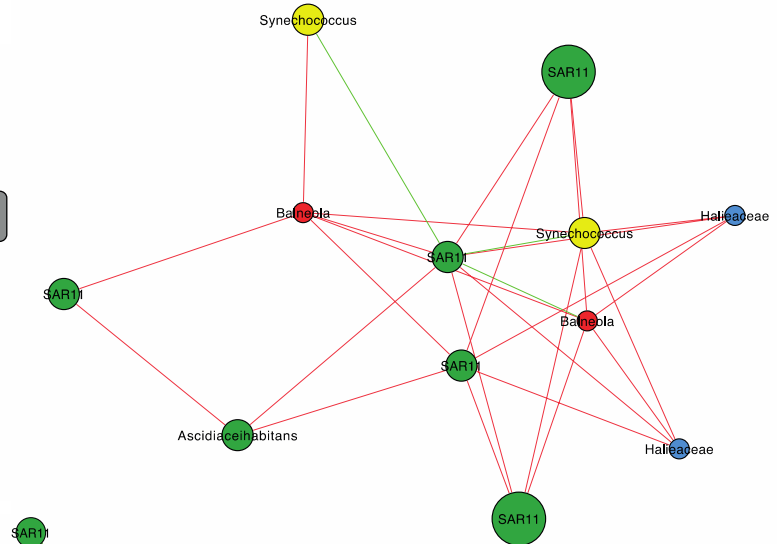

Cluster 3

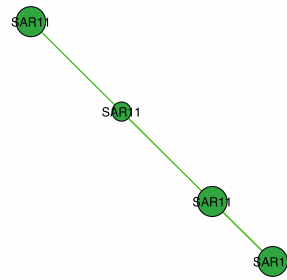

Cluster 4

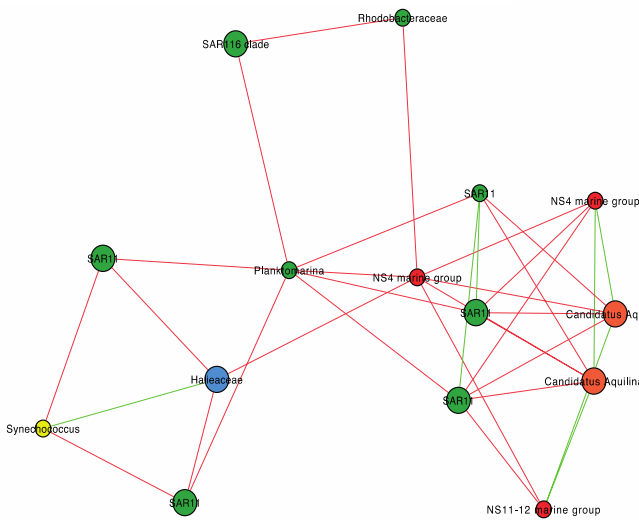

Cluster 5

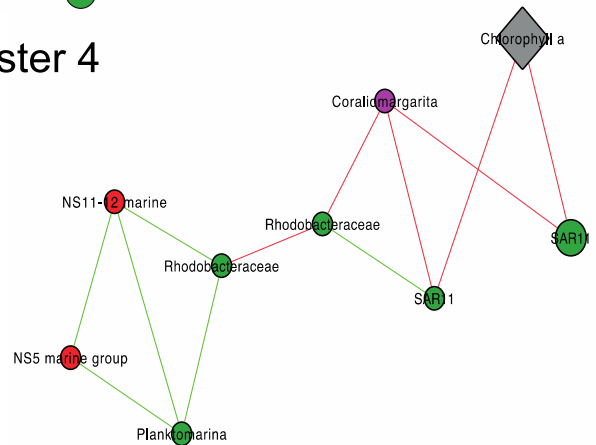

Cluster 6

**Fig. S7** Co-occurrence global network and sub-networks according to MCODE analysis of bacterial taxa and environmental variables derived from the OTU table and showing only statistically significant correlations. Node size correspond to the relative abundance of the OTU. Nodes colors correspond to main bacterioplankton classes. Green and red lines represent positive and negative correlations, respectively.



### 3. Supplementary Tables

**Table S1.** Samples characteristics in Toulon Bay.

**Table S2.** Environmental (biotic and abiotic) characteristics of seawater samples in June 2015. The values represent the mean between surface and bottom samples and the standard deviation for each parameter.

**Table S3.** Global and pairwise Permutational multivariate analysis of variance (PERMANOVA) examining the effects of the factors “Site”, “Date” and “Depth” on the bacterioplankton communities. Key to abbreviations and column headings: D.f, degrees of freedom; MS, mean square; F, F ratio;  $R^2$ , coefficient of determination; P, p-value. Probabilities are marked as follows ‘\*\*\*\*’  $p < 0.001$ ; ‘\*\*\*’  $p < 0.01$ ; ‘\*’  $p < 0.05$ .

**Table S4.** The contribution of particular biomarker to the Bray-Curtis similarity index in 41p-Pt15, 41p-MIS, 41p-6ext, Pt15-MIS, Pt15-6ext and MIS-6ext., using SIMPER (similarity of percentage) analysis. The cut-off for low contribution was set at a cumulative contribution of 90%. P, p-value. Probabilities are marked as follows ‘\*\*\*\*’  $p < 0.001$ ; ‘\*\*\*’  $p < 0.01$ ; ‘\*’  $p < 0.05$ .

**Table S5.** Results for variation partitioning with the environmental variables, which were selected by forward selection in the redundancy analyses (RDAs) (see Figure 4 in the main manuscript). The contribution (%) of each environmental variable and its significance are given.

**Table S6.** Network analysis results, showing betweenness centrality (BC), closeness centrality (CC), number of connections (Degree) and relative abundance of keystone OTUs in the global network.

**Table S7.** Fraction of OTUs not mapped to KEGG organisms (FTU) and percentage of OTUs mapped to KEGG organisms (%)

**Table S1.** Samples characteristics in Toulon Bay.

| Sample Name | Site | Depth   | Time | Date        | Latitude (°N) | Longitude (°E) | No. of raw amplicons | No. of amplicons after filtering | No. of OTUs | Statistical analyses |
|-------------|------|---------|------|-------------|---------------|----------------|----------------------|----------------------------------|-------------|----------------------|
| 41pprof1    | 41p  | Surface | T0   | 1-Jun-2015  | 43° 4'21.74"  | 5°57'21.48"    | 67550                | 19242                            | 1045        | X                    |
| 41pprof3    | 41p  | Bottom  | T0   | 1-Jun-2015  | 43° 4'21.74"  | 5°57'21.48"    | 16150                | 5203                             | 764         | X                    |
| 41pprof5    | 41p  | Surface | T1   | 8-Jun-2015  | 43° 4'21.74"  | 5°57'21.48"    | 8214                 | 2139                             | 948         |                      |
| 41pprof7    | 41p  | Bottom  | T1   | 8-Jun-2015  | 43° 4'21.74"  | 5°57'21.48"    | 56522                | 13726                            | 810         | X                    |
| 41pprof9    | 41p  | Surface | T1b  | 9-Jun-2015  | 43° 4'21.74"  | 5°57'21.48"    | 27834                | 8457                             | 882         | X                    |
| 41pprof11   | 41p  | Bottom  | T1b  | 9-Jun-2015  | 43° 4'21.74"  | 5°57'21.48"    | 34946                | 8903                             | 742         | X                    |
| 41pprof13   | 41p  | Surface | T2   | 15-Jun-2015 | 43° 4'21.74"  | 5°57'21.48"    | 98556                | 35735                            | 1110        | X                    |
| 41pprof15   | 41p  | Bottom  | T2   | 15-Jun-2015 | 43° 4'21.74"  | 5°57'21.48"    | 48628                | 14238                            | 1205        | X                    |
| 41pprof17   | 41p  | Surface | T3   | 22-Jun-2015 | 43° 4'21.74"  | 5°57'21.48"    | 35514                | 10663                            | 1100        | X                    |
| 41pprof19   | 41p  | Bottom  | T3   | 22-Jun-2015 | 43° 4'21.74"  | 5°57'21.48"    | 40064                | 12419                            | 909         | X                    |
| 41pprof21   | 41p  | Surface | TF   | 28-Jun-2015 | 43° 4'21.74"  | 5°57'21.48"    | 30794                | 7890                             | 965         | X                    |
| 41pprof23   | 41p  | Bottom  | TF   | 28-Jun-2015 | 43° 4'21.74"  | 5°57'21.48"    | 41586                | 12528                            | 848         | X                    |
| 15prof1     | Pt15 | Surface | T0   | 1-Jun-2015  | 43° 5'24.82"  | 5°54'39.05"    | 15760                | 4349                             | 788         | X                    |
| 15prof3     | Pt15 | Bottom  | T0   | 1-Jun-2015  | 43° 5'24.82"  | 5°54'39.05"    | 12240                | 2908                             | 993         |                      |
| 15prof5     | Pt15 | Surface | T1   | 8-Jun-2015  | 43° 5'24.82"  | 5°54'39.05"    | 24982                | 5941                             | 705         | X                    |
| 15prof7     | Pt15 | Bottom  | T1   | 8-Jun-2015  | 43° 5'24.82"  | 5°54'39.05"    | 45838                | 8534                             | 891         | X                    |
| 15prof9     | Pt15 | Surface | T2   | 15-Jun-2015 | 43° 5'24.82"  | 5°54'39.05"    | 47776                | 13051                            | 968         | X                    |
| 15prof11    | Pt15 | Bottom  | T2   | 15-Jun-2015 | 43° 5'24.82"  | 5°54'39.05"    | 45218                | 9660                             | 804         | X                    |
| 15prof13    | Pt15 | Surface | T3   | 22-Jun-2015 | 43° 5'24.82"  | 5°54'39.05"    | 32980                | 6527                             | 999         | X                    |
| 15prof15    | Pt15 | Bottom  | T3   | 22-Jun-2015 | 43° 5'24.82"  | 5°54'39.05"    | 7124                 | 1557                             | 903         |                      |
| 15prof17    | Pt15 | Surface | TF   | 28-Jun-2015 | 43° 5'24.82"  | 5°54'39.05"    | 8202                 | 1928                             | 896         |                      |
| 15prof19    | Pt15 | Bottom  | TF   | 28-Jun-2015 | 43° 5'24.82"  | 5°54'39.05"    | 9788                 | 2584                             | 936         |                      |
| 12prof1     | Pt12 | Surface | T0   | 1-Jun-2015  | 43° 6'34.96"  | 5°55'41.09"    | 21820                | 4633                             | 971         | X                    |
| 12prof3     | Pt12 | Bottom  | T0   | 1-Jun-2015  | 43° 6'34.96"  | 5°55'41.09"    | 30610                | 6160                             | 930         | X                    |
| 12prof5     | Pt12 | Surface | T1   | 8-Jun-2015  | 43° 6'34.96"  | 5°55'41.09"    | 38604                | 7060                             | 762         | X                    |
| 12prof7     | Pt12 | Bottom  | T1   | 8-Jun-2015  | 43° 6'34.96"  | 5°55'41.09"    | 8746                 | 1266                             | 763         |                      |
| 12prof9     | Pt12 | Surface | T2   | 15-Jun-2015 | 43° 6'34.96"  | 5°55'41.09"    | 16898                | 2813                             | 835         |                      |
| 12prof11    | Pt12 | Bottom  | T2   | 15-Jun-2015 | 43° 6'34.96"  | 5°55'41.09"    | 23846                | 4125                             | 948         | X                    |
| 12prof13    | Pt12 | Surface | T3   | 22-Jun-2015 | 43° 6'34.96"  | 5°55'41.09"    | 17414                | 2368                             | 617         |                      |
| 12prof15    | Pt12 | Bottom  | T3   | 22-Jun-2015 | 43° 6'34.96"  | 5°55'41.09"    | 33336                | 7427                             | 800         | X                    |
| 12prof17    | Pt12 | Surface | TF   | 28-Jun-2015 | 43° 6'34.96"  | 5°55'41.09"    | 55852                | 7208                             | 635         | X                    |
| 12prof19    | Pt12 | Bottom  | TF   | 28-Jun-2015 | 43° 6'34.96"  | 5°55'41.09"    | 28124                | 7004                             | 630         | X                    |
| MISprof1    | MIS  | Surface | T0   | 1-Jun-2015  | 43° 7'9.37"   | 5°54'40.07"    | 19036                | 4044                             | 734         | X                    |
| MISprof3    | MIS  | Bottom  | T0   | 1-Jun-2015  | 43° 7'9.37"   | 5°54'40.07"    | 13550                | 2828                             | 801         |                      |
| MISprof5    | MIS  | Surface | T1   | 8-Jun-2015  | 43° 7'9.37"   | 5°54'40.07"    | 25806                | 5595                             | 823         | X                    |
| MISprof7    | MIS  | Bottom  | T1   | 8-Jun-2015  | 43° 7'9.37"   | 5°54'40.07"    | 27530                | 4296                             | 672         | X                    |
| MISprof9    | MIS  | Surface | T2   | 15-Jun-2015 | 43° 7'9.37"   | 5°54'40.07"    | 16944                | 3730                             |             |                      |
| MISprof11   | MIS  | Bottom  | T2   | 15-Jun-2015 | 43° 7'9.37"   | 5°54'40.07"    | 14946                | 2977                             |             |                      |
| MISprof13   | MIS  | Surface | T3   | 22-Jun-2015 | 43° 7'9.37"   | 5°54'40.07"    | 20490                | 4057                             |             | X                    |
| MISprof15   | MIS  | Bottom  | T3   | 22-Jun-2015 | 43° 7'9.37"   | 5°54'40.07"    | 21712                | 4650                             |             | X                    |

|            |      |         |    |             |             |             |       |       |   |
|------------|------|---------|----|-------------|-------------|-------------|-------|-------|---|
| MISprof17  | MIS  | Surface | TF | 28-Jun-2015 | 43° 7'9.37" | 5°54'40.07" | 17270 | 3913  |   |
| MISprof19  | MIS  | Bottom  | TF | 28-Jun-2015 | 43° 7'9.37" | 5°54'40.07" | 21438 | 3350  |   |
| 6extprof1  | 6ext | Surface | T0 | 1-Jun-2015  | 43° 7'8.65" | 5°54'57.31" | 22718 | 4846  | X |
| 6extprof3  | 6ext | Bottom  | T0 | 1-Jun-2015  | 43° 7'8.65" | 5°54'57.31" | 32860 | 7517  | X |
| 6extprof5  | 6ext | Surface | T1 | 8-Jun-2015  | 43° 7'8.65" | 5°54'57.31" | 30190 | 5032  | X |
| 6extprof7  | 6ext | Bottom  | T1 | 8-Jun-2015  | 43° 7'8.65" | 5°54'57.31" | 14116 | 4170  | X |
| 6extprof9  | 6ext | Surface | T2 | 15-Jun-2015 | 43° 7'8.65" | 5°54'57.31" | 16930 | 4044  | X |
| 6extprof11 | 6ext | Bottom  | T2 | 15-Jun-2015 | 43° 7'8.65" | 5°54'57.31" | 44004 | 3948  |   |
| 6extprof13 | 6ext | Surface | T3 | 22-Jun-2015 | 43° 7'8.65" | 5°54'57.31" | 20680 | 4549  | X |
| 6extprof15 | 6ext | Bottom  | T3 | 22-Jun-2015 | 43° 7'8.65" | 5°54'57.31" | 9016  | 2552  |   |
| 6extprof17 | 6ext | Surface | TF | 28-Jun-2015 | 43° 7'8.65" | 5°54'57.31" | 54180 | 11316 | X |
| 6extprof19 | 6ext | Bottom  | TF | 28-Jun-2015 | 43° 7'8.65" | 5°54'57.31" | 13856 | 3349  |   |

---

**Table S2.** Environmental (biotic and abiotic) characteristics of seawater samples in June 2015. The values represent the mean between surface and bottom samples and the standard deviation for each parameter.

| Site | Date | Al          | As        | Ba        | Be        | Cs         | Cr          | Fe        | Li           | Mn        |
|------|------|-------------|-----------|-----------|-----------|------------|-------------|-----------|--------------|-----------|
|      |      | (nM)        | (nM)      | (nM)      | (nM)      | (nM)       | (nM)        | (nM)      | (nM)         | (nM)      |
| 41p  | T0   | 9358 ± 405  | 28 ± 0,5  | 59 ± 0,20 | 23 ± 5,2  | 2,6 ± 0,0  | 14 ± 1,9    | 116 ± 9,5 | 33167 ± 1818 | 17 ± 0,60 |
|      | T1   | 8918 ± 100  | 23 ± 2,5  | 61 ± 1,7  | 24 ± 7,2  | 2,7 ± 0,05 | 7,8 ± 0,45  | 98 ± 9,7  | 30461 ± 382  | 17 ± 2,2  |
|      | T1b  | 8330 ± 236  | 25 ± 2,3  | 63 ± 0,35 | 39 ± 6,5  | 2,6 ± 0,0  | 6,4 ± 0,90  | 88 ± 1,4  | 28587 ± 594  | 15 ± 0,60 |
|      | T2   | 52 ± 18     | 23 ± 0,35 | 59 ± 1,6  | 44 ± 9,8  | 2,5 ± 0,10 | 3,9 ± 1,9   | 15 ± 0,09 | 27782 ± 379  | 11 ± 2,2  |
|      | T3   | 193 ± 26    | 30 ± 3,6  | 57 ± 0,85 | 53 ± 1,3  | 2,5 ± 0,05 | 4,6 ± 0,55  | 13 ± 3,1  | 26165 ± 29   | 10 ± 1,2  |
|      | TF   | 2068 ± 87   | 28 ± 2,3  | 57 ± 0,45 | 89 ± 0,65 | 2,4 ± 0,0  | 6,3 ± 0,8   | 55 ± 21   | 27020 ± 147  | 14 ± 0,09 |
| Pt15 | T0   | 11044 ± 89  | 27 ± 2,7  | 60 ± 0,05 | 41 ± 2,0  | 2,6 ± 0,0  | 11 ± 1,2    | 155 ± 9,4 | 37593 ± 537  | 31 ± 2,7  |
|      | T1   | 8594 ± 196  | 30 ± 0,25 | 64 ± 0,95 | 36 ± 5,2  | 2,6 ± 0,0  | 7,9 ± 0,55  | 103 ± 14  | 28962 ± 147  | 28 ± 2,6  |
|      | T2   | 137 ± 46    | 24 ± 0,25 | 59 ± 2,05 | 36 ± 10   | 2,4 ± 0,0  | 5,3 ± 0,0   | 45 ± 15   | 27022 ± 56   | 27 ± 6,3  |
|      | T3   | 252 ± 29    | 29 ± 4,0  | 59 ± 0,05 | 44 ± 3,9  | 2,5 ± 0,0  | 5,7 ± 0,75  | 33 ± 6,6  | 26242 ± 104  | 17 ± 1,4  |
|      | TF   | 2228 ± 51   | 26 ± 2,0  | 60 ± 0,05 | 72 ± 19   | 2,6 ± 0,0  | 5,2 ± 0,80  | 158 ± 110 | 27834 ± 112  | 17 ± 1,3  |
| Pt12 | T0   | 11007 ± 97  | 25 ± 3,3  | 59 ± 0,75 | 42 ± 5,2  | 2,6 ± 0,05 | 11 ± 0,20   | 133 ± 2,7 | 36473 ± 15   | 25 ± 1,9  |
|      | T1   | 9070 ± 652  | 27 ± 2,4  | 70 ± 5,4  | 33 ± 0,0  | 2,6 ± 0,0  | 5,8 ± 0,25  | 108 ± 6,0 | 29454 ± 279  | 41 ± 11   |
|      | T2   | 163 ± 31    | 24 ± 1,9  | 59 ± 1,2  | 42 ± 0,0  | 2,4 ± 0,0  | 5,6 ± 0,25  | 21 ± 7,5  | 26666 ± 239  | 29 ± 3,2  |
|      | T3   | 344 ± 12    | 24 ± 7,05 | 59 ± 0,0  | 64 ± 5,2  | 2,6 ± 0,05 | 5,2 ± 0,6   | 20 ± 1,7  | 27049 ± 347  | 18 ± 0,65 |
|      | TF   | 2050 ± 500  | 21 ± 3,0  | 58 ± 0,95 | 65 ± 13   | 2,5 ± 0,0  | 9,6 ± 3,0   | 41 ± 7,9  | 25734 ± 1912 | 18 ± 1,05 |
| MIS  | T0   | 9663 ± 195  | 26 ± 1,7  | 63 ± 0,90 | 34 ± 1,3  | 2,6 ± 0,05 | 10 ± 0,45   | 110 ± 2,0 | 33726 ± 409  | 25 ± 1,2  |
|      | T1   | 8654 ± 161  | 20 ± 1,9  | 65 ± 2,7  | 46 ± 0,0  | 2,6 ± 0,0  | 6,8 ± 1,7   | 104 ± 2,2 | 28456 ± 505  | 30 ± 0,40 |
|      | T2   | 136 ± 50    | 24 ± 0,80 | 62 ± 3,3  | 50 ± 3,3  | 2,4 ± 0,10 | 5,05 ± 0,45 | 28 ± 9,3  | 26153 ± 393  | 33 ± 3,0  |
|      | T3   | 356 ± 41    | 28 ± 3,3  | 59 ± 1,3  | 64 ± 0,65 | 2,5 ± 0,05 | 5,5 ± 0,35  | 29 ± 3,0  | 27067 ± 419  | 20 ± 0,50 |
|      | TF   | 1940 ± 87   | 28 ± 1,2  | 59 ± 0,20 | 83 ± 22   | 2,5 ± 0,05 | 8,2 ± 1,3   | 50 ± 0,75 | 24853 ± 610  | 17 ± 0,0  |
| 6ext | T0   | 10154 ± 571 | 26 ± 1,2  | 70 ± 1,6  | 31 ± 2,0  | 2,6 ± 0,0  | 6,4 ± 0,2   | 120 ± 17  | 31818 ± 217  | 44 ± 13   |
|      | T1   | 8392 ± 0,0  | 27 ± 0,0  | 74 ± 0,0  | 47 ± 0,0  | 2,7 ± 0,0  | 6,6 ± 0,0   | 111 ± 0,0 | 29390 ± 0,0  | 34 ± 0,0  |
|      | T2   | 193 ± 32    | 30 ± 2,0  | 65 ± 2,7  | 46 ± 3,3  | 2,5 ± 0,05 | 4,8 ± 0,15  | 33 ± 6,9  | 25905 ± 669  | 41 ± 5,1  |
|      | T3   | 327 ± 9,6   | 27 ± 7,1  | 63 ± 1,7  | 79 ± 8,5  | 2,5 ± 0,0  | 4,5 ± 0,10  | 42 ± 0,5  | 27231 ± 640  | 32 ± 9,5  |
|      | TF   | 2614 ± 51   | 33 ± 0,85 | 73 ± 6,1  | 107 ± 1,3 | 2,6 ± 0,05 | 6,2 ± 1,8   | 63 ± 7,0  | 26565 ± 77   | 37 ± 11   |

**Table S2. Continued**

| Site | Date | Mo95        | Rb          | Sb         | Sn          | Sr               | Ti         | U         | V          |
|------|------|-------------|-------------|------------|-------------|------------------|------------|-----------|------------|
|      |      | (nM)        | (nM)        | (nM)       | (nM)        | (nM)             | (nM)       | (nM)      | (nM)       |
| 41p  | T0   | 152 ± 2,0   | 1529 ± 27   | 3,6 ± 0,05 | 2,0 ± 0,45  | 109807 ± 1597    | 25 ± 1,5   | 13 ± 0,75 | 47 ± 1,9   |
|      | T1   | 159 ± 3,0   | 1502 ± 8,2  | 3,4 ± 0,20 | 2,0 ± 0,05  | 108072 ± 3623    | 23 ± 1,0   | 16 ± 0,35 | 46 ± 1,7   |
|      | T1b  | 171 ± 0,55  | 1464 ± 10   | 3,3 ± 0,20 | 2,2 ± 0,10  | 106015 ± 702     | 22 ± 1,4   | 17 ± 0,0  | 45 ± 0,101 |
|      | T2   | 164 ± 11    | 1461 ± 14   | 3,6 ± 0,05 | 1,8 ± 0,15  | 104642 ± 1296    | 0,80 ± 0,0 | 16 ± 1,3  | 41 ± 0,30  |
|      | T3   | 1601 ± 0,65 | 1450 ± 1,0  | 3,7 ± 0,09 | 1,4 ± 0,0   | 103385 ± 474     | 3,2 ± 1,1  | 16 ± 0,0  | 39 ± 1,5   |
|      | TF   | 168 ± 0,05  | 1453 ± 6,0  | 3,9 ± 0,10 | 1,2 ± 0,0   | 103734 ± 75      | 6,2 ± 0,40 | 16 ± 0,0  | 43 ± 1,8   |
| Pt15 | T0   | 159 ± 1,7   | 1593 ± 9,8  | 3,8 ± 0,20 | 2,35 ± 0,05 | 113367 ± 718     | 29 ± 2,9   | 12 ± 0,15 | 50 ± 0,0   |
|      | T1   | 164 ± 1,0   | 1467 ± 4,9  | 3,5 ± 0,0  | 2,1 ± 0,0   | 104931 ± 701     | 23 ± 1,8   | 17 ± 0,10 | 45 ± 1,4   |
|      | T2   | 151 ± 0,55  | 1429 ± 11   | 3,7 ± 0,0  | 1,7 ± 0,0   | 102450 ± 969     | 2,1 ± 0,0  | 15 ± 0,10 | 40 ± 0,0   |
|      | T3   | 162 ± 0,50  | 1439 ± 3,9  | 3,9 ± 0,10 | 1,35 ± 0,05 | 104415 ± 351     | 2,3 ± 1,7  | 16 ± 0,05 | 40 ± 2,2   |
|      | TF   | 172 ± 1,6   | 1457 ± 9,3  | 5,5 ± 0,05 | 1,2 ± 0,0   | 104481 ± 612     | 8,3 ± 1,3  | 16 ± 0,10 | 44 ± 0,20  |
| Pt12 | T0   | 156 ± 0,35  | 1556 ± 0,40 | 3,7 ± 0,05 | 2,2 ± 0,0   | 111328 ± 778     | 32 ± 0,50  | 12 ± 0,35 | 49 ± 0,40  |
|      | T1   | 163 ± 1,2   | 1479 ± 2,3  | 4,8 ± 1,2  | 3,6 ± 1,3   | 106465 ± 396     | 25 ± 0,60  | 17 ± 0,0  | 44 ± 2,2   |
|      | T2   | 153 ± 2,4   | 1420 ± 16   | 3,8 ± 0,10 | 1,65 ± 0,05 | 101902 ± 383     | 0,60 ± 0,0 | 15 ± 0,15 | 39 ± 0,40  |
|      | T3   | 164 ± 2,2   | 1441 ± 2,5  | 4,0 ± 0,15 | 1,3 ± 0,0   | 103906 ± 8,6     | 3,1 ± 1,2  | 16 ± 0,0  | 40 ± 1,7   |
|      | TF   | 165 ± 5,8   | 1428 ± 41   | 5,7 ± 0,35 | 1 ± 0,0     | 102253 ± 1402    | 5,4 ± 1,3  | 16 ± 0,35 | 39 ± 1,7   |
| MIS  | T0   | 154 ± 1,0   | 1524 ± 2,0  | 3,5 ± 0,10 | 1,95 ± 0,05 | 109185 ± 607     | 33 ± 1,6   | 14 ± 0,25 | 47 ± 0,40  |
|      | T1   | 167 ± 3,2   | 1459 ± 15   | 3,8 ± 0,10 | 2,3 ± 0,10  | 105079 ± 863     | 27 ± 1,5   | 17 ± 0,15 | 44 ± 1,0   |
|      | T2   | 155 ± 2,3   | 1424 ± 21   | 4,1 ± 0,35 | 1,6 ± 0,0   | 102697 ± 1857    | 0,80 ± 0,0 | 15 ± 0,25 | 38 ± 0,20  |
|      | T3   | 165 ± 0,25  | 1432 ± 11   | 4,2 ± 0,05 | 1,5 ± 0,0   | 102172 ± 1461,05 | 1,8 ± 0,95 | 16 ± 0,10 | 40 ± 0,80  |
|      | TF   | 163 ± 1,0   | 1405 ± 13   | 5,7 ± 0,10 | 1,05 ± 0,05 | 101164 ± 810     | 9,4 ± 1,6  | 16 ± 0,15 | 39 ± 0,70  |
| 6ext | T0   | 157 ± 0,40  | 1505 ± 2,2  | 4,9 ± 0,20 | 2,35 ± 0,05 | 107618 ± 321     | 30 ± 3,6   | 15 ± 0,25 | 46 ± 1,6   |
|      | T1   | 173 ± 0,0   | 1489 ± 0,0  | 4,8 ± 0,0  | 2,4 ± 0,0   | 107221 ± 0,0     | 27 ± 0,0   | 17 ± 0,0  | 44 ± 0,0   |
|      | T2   | 155 ± 2,7   | 1418 ± 37   | 4,7 ± 0,30 | 1,7 ± 0,0   | 102095 ± 2733    | 1,4 ± 0,35 | 15 ± 0,40 | 38 ± 1,7   |
|      | T3   | 167 ± 2,8   | 1450 ± 19   | 5,7 ± 0,20 | 1,55 ± 0,15 | 103881 ± 490     | 4,5 ± 1,2  | 16 ± 0,30 | 40 ± 1,7   |
|      | TF   | 168 ± 0,75  | 1440 ± 12   | 7,6 ± 1,0  | 1,55 ± 0,25 | 103208 ± 28      | 9,8 ± 3,4  | 16 ± 0,20 | 44 ± 1,0   |

**Table S2. Continued**

| Site | Date | Dissolved oxygen      | Dissolved oxygen | pH         | Picoeukaryote         | Nanoeukaryote         |
|------|------|-----------------------|------------------|------------|-----------------------|-----------------------|
|      |      | (mg.L <sup>-1</sup> ) | (%)              | -          | Cell.mL <sup>-1</sup> | Cell.mL <sup>-1</sup> |
| 41p  | T0   | 114 ± 0.15            | 8.6 ± 0.12       | 8.7 ± 0.01 | 2652 ± 244            | 1616 ± 26             |
|      | T1   | 117 ± 1.5             | 8.6 ± 0.22       | 8.6 ± 0.02 | 52 ± 28               | 76 ± 26               |
|      | T1b  | 119 ± 1.6             | 8.7 ± 0.40       | 8.6 ± 0.01 | 728 ± 500             | 1398 ± 556            |
|      | T2   | 110 ± 1.8             | 7.8 ± 0.21       | 8.7 ± 0.02 | 1236 ± 736            | 1357 ± 307            |
|      | T3   | 112 ± 2.8             | 8.0 ± 0.39       | 7.9 ± 0.10 | 492 ± 132             | 1049 ± 107            |
|      | TF   | 109 ± 0.70            | 7.8 ± 0.12       | 7.9 ± 0.02 | 286 ± 76              | 441 ± 29              |
| Pt15 | T0   | 117 ± 3.6             | 8.3 ± 0.22       | 8.7 ± 0.01 | 6737 ± 1995           | 4635 ± 1409           |
|      | T1   | 116 ± 2.6             | 8.3 ± 0.0        | 8.7 ± 0.04 | 327 ± 97              | 313 ± 39              |
|      | T2   | 112 ± 1.2             | 7.8 ± 0.03       | 8.7 ± 0.01 | 14068 ± 8138          | 4763 ± 1653           |
|      | T3   | 114 ± 1.7             | 8.0 ± 0.10       | 8.0 ± 0.02 | 2069 ± 261            | 2475 ± 185            |
|      | TF   | 113 ± 1.3             | 7.9 ± 0.02       | 7.9 ± 0.01 | 3420 ± NA             | 2352 ± NA             |
| Pt12 | T0   | 117 ± 0.65            | NA               | 8.7 ± 0.01 | 3750 ± 372            | 3049 ± 139            |
|      | T1   | 117 ± 1.1             | 8.3 ± 0.19       | 8.7 ± 0.01 | 505 ± 47              | 644 ± 320             |
|      | T2   | 113 ± 2.6             | 7.8 ± 0.11       | 8.7 ± 0.02 | 12033 ± 3589          | 6821 ± 2283           |
|      | T3   | 114 ± 0.19            | 8.0 ± 0.08       | 8.0 ± 0.02 | 2675 ± 577            | 2889 ± 39             |
|      | TF   | 116 ± 0.15            | 8.1 ± 0.09       | 8.0 ± 0.03 | 2967 ± 1123           | 2678 ± 460            |
| MIS  | T0   | 123 ± 1.7             | NA               | 8.6 ± 0.03 | 5165 ± 729            | 4246 ± 290            |
|      | T1   | 122 ± 1.2             | 8.6 ± 0.14       | 8.7 ± 0.04 | 6690 ± 3656           | 5429 ± 963            |
|      | T2   | 109 ± 12              | 7.6 ± 0.73       | 8.7 ± 0.04 | 14735 ± 6003          | 8700 ± 3826           |
|      | T3   | 111 ± 5.4             | 7.8 ± 0.22       | 7.9 ± 0.03 | 8153 ± 1749           | 4078 ± 796            |
|      | TF   | 117 ± 1.6             | 8.2 ± 0.07       | 7.9 ± 0.02 | 11351 ± 3131          | 5537 ± 471            |
| 6ext | T0   | 113 ± 8.4             | 8.3 ± 0.40       | 8.6 ± 0.04 | 15247 ± 4973          | 6236 ± 624            |
|      | T1   | NA                    | NA               | NA         | 926 ± NA              | 2230 ± NA             |
|      | T2   | 106 ± 15              | 7.3 ± 0.93       | 8.7 ± 0.01 | 12863 ± 6431          | 7486 ± 4612           |
|      | T3   | 108 ± 5.9             | 7.6 ± 0.30       | 7.9 ± 0.03 | 8403 ± 1285           | 3444 ± 330            |
|      | TF   | 113 ± 8.2             | 7.8 ± 0.39       | 7.9 ± 0.10 | 16378 ± 3204          | 5666 ± 1492           |

**Table S3.** Global and pairwise Permutational multivariate analysis of variance (PERMANOVA) examining the effects of the factors “Site”, “Date” and “Depth” on the bacterioplankton communities. Key to abbreviations and column headings: D.f, degrees of freedom; MS, mean square; F, F ratio; R<sup>2</sup>, coefficient of determination; P, p-value. Probabilities are marked as follows ‘\*\*\*’ p<0.001; ‘\*\*’ p<0.01; ‘\*’ p<0.05.

| Source of variation | D.f      | MS              | F             | R <sup>2</sup> | P            | Significance |
|---------------------|----------|-----------------|---------------|----------------|--------------|--------------|
| <b>Site</b>         | <b>4</b> | <b>0.146172</b> | <b>7.1909</b> | <b>0.46071</b> | <b>0.001</b> | <b>***</b>   |
| <b>Date</b>         | <b>5</b> | <b>0.043509</b> | <b>2.1404</b> | <b>0.17142</b> | <b>0.024</b> | <b>*</b>     |
| Depth               | 1        | 0.002537        | 0.1248        | 0.00200        | 0.983        |              |
| Site:Date           | 13       | 0.016955        | 0.8341        | 0.17367        | 0.696        |              |
| Residuals           | 12       | 0.020327        | 0.19221       |                |              |              |
| Total               | 35       | 1.00000         |               |                |              |              |

|      | 41p               | 6ext            | MIS    | Pt12   |
|------|-------------------|-----------------|--------|--------|
| 6ext | <b>0.0050</b> *** | -               | -      | -      |
| MIS  | <b>0.0050</b> *** | 0.9270          | -      | -      |
| Pt12 | <b>0.0067</b> *** | <b>0.0280</b> * | 0.1714 | -      |
| Pt15 | <b>0.0125</b> *   | <b>0.0483</b> * | 0.1725 | 0.3522 |

**Table S4.** The contribution of particular biomarker to the Bray-Curtis similarity index in 41p-Pt15, 41p-MIS, 41p-6ext, Pt15-MIS, Pt15-6ext and MIS-6ext., using SIMPER (similarity of percentage) analysis. The cut-off for low contribution was set at a cumulative contribution of 90%. P, p-value. Probabilities are marked as follows ‘\*\*\*’ p<0.001; ‘\*\*’ p<0.01; ‘\*’ p<0.05.

| <b>41p - Pt15</b>                 |                     |              |            |           |
|-----------------------------------|---------------------|--------------|------------|-----------|
| Biomarker                         |                     | Contribution | Cumulative | P         |
| Higher taxonomic rank             | Phylum / Class      | %            | %          | -         |
| PS1 clade                         | Alphaproteobacteria | 1.81         | 32.42      | 0.004 **  |
| PS1 clade uncultured bacterium    | Alphaproteobacteria | 1.72         | 35.32      | 0.007 **  |
| OM43 clade                        | Betaproteobacteria  | 1.69         | 38.17      | 0.001 *** |
| Methylophilaceae                  | Betaproteobacteria  | 1.67         | 40.99      | 0.002 **  |
| Methylophilales                   | Betaproteobacteria  | 1.67         | 43.80      | 0.002 **  |
| Betaproteobacteria                | Proteobacteria      | 1.50         | 48.99      | 0.001 *** |
| NS7 marine group Other            | Flavobacteriia      | 1.49         | 51.49      | 0.004 **  |
| NS7 marine group                  | Flavobacteriia      | 1.49         | 54.00      | 0.004 **  |
| SAR406 clade uncultured bacterium | Marinimicrobia      | 1.43         | 56.41      | 0.003 **  |
| SAR406 clade                      | Marinimicrobia      | 1.43         | 58.83      | 0.003 **  |
| S25_593 uncultured bacterium      | Alphaproteobacteria | 1.27         | 60.98      | 0.003 **  |
| S25_593                           | Alphaproteobacteria | 1.27         | 63.12      | 0.003 **  |
| Rhizobiales                       | Alphaproteobacteria | 1.19         | 67.24      | 0.006 **  |
| Surface 4                         | Alphaproteobacteria | 1.15         | 69.17      | 0.025 *   |
| Flammeovirgaceae uncultured       | Cytophagia          | 1.13         | 71.08      | 0.008 **  |
| Rickettsiales                     | Alphaproteobacteria | 1.06         | 78.35      | 0.001 *** |
| SAR116 clade                      | Alphaproteobacteria | 1.05         | 80.12      | 0.002 **  |

  

| <b>41p - MIS</b>                  |                     |              |            |           |
|-----------------------------------|---------------------|--------------|------------|-----------|
| Biomarker                         |                     | Contribution | Cumulative | P         |
| Higher taxonomic rank             | Phylum / Class      | %            | %          | -         |
| Candidatus Aquiluna               | Actinobacteria      | 6.68         | 9.61       | 0.002 **  |
| Microbacteriaceae                 | Actinobacteria      | 5.55         | 17.58      | 0.002 **  |
| Micrococcales                     | Actinobacteria      | 5.53         | 25.54      | 0.002 **  |
| Actinobacteria                    | Actinobacteria      | 5.08         | 32.85      | 0.003 **  |
| PS1 clade                         | Alphaproteobacteria | 2.11         | 42.58      | 0.003 **  |
| PS1 clade uncultured bacterium    | Alphaproteobacteria | 1.91         | 45.33      | 0.017 *   |
| NS7 marine group Other            | Flavobacteriia      | 1.79         | 47.89      | 0.001 *** |
| NS7 marine group                  | Flavobacteriia      | 1.79         | 50.46      | 0.001 *** |
| Surface 4                         | Alphaproteobacteria | 1.47         | 54.70      | 0.003 **  |
| SAR406 clade uncultured bacterium | Marinimicrobia      | 1.47         | 56.81      | 0.009 **  |
| SAR406 clade                      | Marinimicrobia      | 1.47         | 58.92      | 0.009 **  |
| Candidatus Actinomarina           | Acidimicrobiia      | 1.46         | 61.02      | 0.012 *   |



|                                   |                     |      |       |           |
|-----------------------------------|---------------------|------|-------|-----------|
| OM1 clade                         | Acidimicrobiia      | 1.44 | 63.09 | 0.012 *   |
| S25_593 uncultured bacterium      | Alphaproteobacteria | 1.38 | 65.07 | 0.006 **  |
| S25_593                           | Alphaproteobacteria | 1.38 | 67.04 | 0.006 **  |
| Acidimicrobiales                  | Acidimicrobiia      | 1.37 | 69.01 | 0.012 *   |
| Acidimicrobiia                    | Actinobacteria      | 1.37 | 70.97 | 0.012 *   |
| Rhizobiales                       | Alphaproteobacteria | 1.36 | 72.92 | 0.002 **  |
| SAR116 clade                      | Alphaproteobacteria | 1.30 | 74.80 | 0.001 *** |
| Rickettsiales                     | Alphaproteobacteria | 1.29 | 76.65 | 0.001 *** |
| Thiothrix                         | Gammaproteobacteria | 1.26 | 78.46 | 0.024 *   |
| Thiotrichaceae                    | Gammaproteobacteria | 1.26 | 80.26 | 0.024 *   |
| Thiotrichales                     | Gammaproteobacteria | 1.26 | 82.07 | 0.024 *   |
| Flammeovirgaceae uncultured       | Cytophagia          | 1.16 | 83.74 | 0.035 *   |
| SAR116 clade uncultured bacterium | Alphaproteobacteria | 1.00 | 89.86 | 0.001 *** |

#### 41p - 6ext

| Biomarker                         | Contribution        | Cumulative | P     |           |
|-----------------------------------|---------------------|------------|-------|-----------|
| Higher taxonomic rank             | Phylum / Class      | %          | %     |           |
| Candidatus Aquiluna               | Actinobacteria      | 5.75       | 7.74  | 0.008 **  |
| Microbacteriaceae                 | Actinobacteria      | 4.79       | 14.19 | 0.010 **  |
| Micrococcales                     | Actinobacteria      | 4.78       | 20.63 | 0.010 **  |
| Planktomarina                     | Alphaproteobacteria | 4.66       | 26.90 | 0.001 *** |
| Actinobacteria                    | Actinobacteria      | 4.35       | 32.75 | 0.017 *   |
| Tenacibaculum                     | Flavobacteriia      | 3.25       | 37.14 | 0.001 *** |
| PS1 clade                         | Alphaproteobacteria | 2.01       | 39.85 | 0.002 **  |
| NS7 marine group Other            | Flavobacteriia      | 1.90       | 42.40 | 0.001 *** |
| NS7 marine group                  | Flavobacteriia      | 1.90       | 44.96 | 0.001 *** |
| PS1 clade uncultured bacterium    | Alphaproteobacteria | 1.83       | 47.42 | 0.007 **  |
| Formosa                           | Flavobacteriia      | 1.67       | 49.67 | 0.001 *** |
| Candidatus Actinomarina           | Acidimicrobiia      | 1.65       | 51.89 | 0.001 *** |
| OM1 clade                         | Acidimicrobiia      | 1.63       | 54.08 | 0.001 *** |
| Surface 4 uncultured bacterium    | Alphaproteobacteria | 1.58       | 56.21 | 0.003 **  |
| Acidimicrobiales                  | Acidimicrobiia      | 1.53       | 58.27 | 0.001 *** |
| Acidimicrobiia                    | Actinobacteria      | 1.53       | 60.33 | 0.001 *** |
| Surface 4                         | Alphaproteobacteria | 1.52       | 62.37 | 0.001 *** |
| S25_593 uncultured bacterium      | Alphaproteobacteria | 1.44       | 64.31 | 0.001 *** |
| S25_593                           | Alphaproteobacteria | 1.44       | 66.24 | 0.001 *** |
| OM43 clade                        | Betaproteobacteria  | 1.40       | 68.13 | 0.037 *   |
| Methylophilaceae                  | Betaproteobacteria  | 1.38       | 70.00 | 0.049 *   |
| Methylophilales                   | Betaproteobacteria  | 1.38       | 71.86 | 0.049 *   |
| SAR406 clade uncultured bacterium | Marinimicrobia      | 1.38       | 73.72 | 0.004 **  |
| SAR406 clade                      | Marinimicrobia      | 1.38       | 75.58 | 0.004 **  |
| SAR116 clade                      | Alphaproteobacteria | 1.37       | 77.42 | 0.001 *** |
| Rickettsiales                     | Alphaproteobacteria | 1.35       | 79.25 | 0.001 *** |

|                               |                     |      |       |           |
|-------------------------------|---------------------|------|-------|-----------|
| Hydrogenophilaceae uncultured | Betaproteobacteria  | 1.32 | 81.03 | 0.001 *** |
| Rhizobiales                   | Alphaproteobacteria | 1.32 | 82.80 | 0.002 **  |
| Hydrogenophilaceae            | Betaproteobacteria  | 1.30 | 84.55 | 0.001 *** |
| Hydrogenophilales             | Betaproteobacteria  | 1.30 | 86.29 | 0.001 *** |
| Thiothrix                     | Gammaproteobacteria | 1.24 | 87.96 | 0.010 **  |
| Thiotrichaceae                | Gammaproteobacteria | 1.24 | 89.63 | 0.010 **  |

---

**Pt15 - MIS**

---

| Biomarker             |                | Contribution | Cumulative | P         |
|-----------------------|----------------|--------------|------------|-----------|
| Higher taxonomic rank | Phylum / Class | %            | %          | -         |
| NS3a marine group     | Flavobacteriia | 2.30         | 56.78      | 0.001 *** |

---

**Pt15 - 6ext**

---

| Biomarker             |                | Contribution | Cumulative | P        |
|-----------------------|----------------|--------------|------------|----------|
| Higher taxonomic rank | Phylum / Class | %            | %          | -        |
| NS3a marine group     | Flavobacteriia | 1.96         | 58.69      | 0.004 ** |
| Formosa               | Flavobacteriia | 1.19         | 61.53      | 0.049 *  |

---

**MIS - 6ext**

---

| Biomarker             |                | Contribution | Cumulative | P       |
|-----------------------|----------------|--------------|------------|---------|
| Higher taxonomic rank | Phylum / Class | %            | %          | -       |
| Formosa               | Flavobacteriia | 1.26         | 59.85      | 0.046 * |

**Table S5.** Results for variation partitioning with the environmental variables, which were selected by forward selection in the redundancy analyses (RDAs) (see Figure 4 in the main manuscript). The contribution (%) of each environmental variable and its significance are given.

| Variable             | Df | Variance | F      | P              |
|----------------------|----|----------|--------|----------------|
| Residual             | 15 | 14,3275  | -      | -              |
| <b>Mn</b>            | 1  | 1,2155   | 1,2726 | <b>0.033 *</b> |
| <b>DOC</b>           | 1  | 1,2114   | 1,2682 | <b>0.038 *</b> |
| <b>Salinity</b>      | 1  | 1,1169   | 1,1693 | <b>0.032 *</b> |
| <b>Cu</b>            | 1  | 1,1144   | 1,1667 | <b>0.047 *</b> |
| <b>Cd</b>            | 1  | 1,013    | 1,0606 | <b>0.049 *</b> |
| Temperature          | 1  | 0,9304   | 0,9741 | 0.073          |
| Cs                   | 1  | 0,822    | 0,8605 | 0.087          |
| Al                   | 1  | 0,7796   | 0,8162 | 0.115          |
| Fe                   | 1  | 0,7228   | 0,7567 | 0.174          |
| Li                   | 1  | 0,6641   | 0,6953 | 0.135          |
| Nanoeukaryotes       | 1  | 0,6113   | 0,64   | 0.243          |
| Rb                   | 1  | 0,6042   | 0,6326 | 0.234          |
| V                    | 1  | 0,563    | 0,5894 | 0.243          |
| Chlorophyll <i>a</i> | 1  | 0,554    | 0,58   | 0.325          |
| Pb                   | 1  | 0,5078   | 0,5316 | 0.338          |
| Zn                   | 1  | 0,4847   | 0,5075 | 0.369          |
| TN                   | 1  | 0,4753   | 0,4976 | 0.374          |
| Ba                   | 1  | 0,4714   | 0,4935 | 0.344          |
| Sr                   | 1  | 0,4324   | 0,4527 | 0.425          |
| Picoeukaryotes       | 1  | 0,3852   | 0,4032 | 0.451          |

**Table S6.** Network analysis results, showing betweenness centrality (BC), closeness centrality (CC), number of connections (Degree) and relative abundance of keystone OTUs in the global network.

| Kingdom  | Class                        | Family            | Genus                | Label                        | BC    | CC    | Degree | Abundance |
|----------|------------------------------|-------------------|----------------------|------------------------------|-------|-------|--------|-----------|
| Bacteria | Alphaproteobacteria          | Surface 1         | uncultured bacterium | OTU-New.ReferenceOTU431      | 0.076 | 0.61  | 74     | 0.14      |
| Bacteria | Alphaproteobacteria          | Surface 1         | uncultured bacterium | uncultured bacteriumcross233 | 0.046 | 0.57  | 64     | 0.14      |
| Bacteria | Alphaproteobacteria          | Surface 1         | uncultured bacterium | OTU-New.ReferenceOTU241      | 0.068 | 0.55  | 68     | 0.20      |
| Bacteria | Alphaproteobacteria          | Surface 1         | uncultured bacterium | uncultured bacteriumcross146 | 0.066 | 0.545 | 68     | 0.20      |
| Bacteria | Actinobacteria               | Microbacteriaceae | Candidatus Aquiluna  | OTU-New.ReferenceOTU237      | 0.054 | 0.55  | 55     | 0.18      |
| Bacteria | Cyanobacteria                | FamilyI           | Synechococcus        | OTU-New.ReferenceOTU365      | 0.021 | 0.55  | 55     | 0.27      |
| Bacteria | Bacteroidetes Incertae Sedis | Unknown Family    | Balneola             | uncultured bacteriumcross200 | 0.020 | 0.55  | 56     | 0.05      |
| Bacteria | Actinobacteria1              | Microbacteriaceae | Candidatus Aquiluna  | uncultured bacteriumcross174 | 0.027 | 0.54  | 52     | 0.18      |
| Bacteria | Cyanobacteria                | FamilyI           | Synechococcus        | OTU-New.ReferenceOTU245      | 0.021 | 0.52  | 38     | 0.09      |
| Bacteria | Alphaproteobacteria          | Rhodobacteraceae  | Planktomarina        | OTU-New.ReferenceOTU394      | 0.024 | 0.51  | 46     | 0.0       |
| Bacteria | Alphaproteobacteria          | Rhodobacteraceae  | uncultured           | uncultured bacteriumcross104 | 0.048 | 0.51  | 35     | 0.21      |
| Bacteria | Alphaproteobacteria          | Rhodobacteraceae  | Planktomarina        | Planktomarina                | 0.027 | 0.51  | 46     | 0.30      |

Table S7. Fraction of OTUs not mapped to KEGG organisms (FTU) and percentage of OTUs mapped to KEGG organisms (%)

| Sample     | FTU  | %     |
|------------|------|-------|
| 41pprof1   | 0,59 | 41,01 |
| 41pprof3   | 0,54 | 46,10 |
| 41pprof7   | 0,51 | 48,73 |
| 41pprof9   | 0,56 | 44,22 |
| 41pprof11  | 0,60 | 39,72 |
| 41pprof13  | 0,37 | 63,04 |
| 41pprof15  | 0,56 | 43,79 |
| 41pprof17  | 0,52 | 47,82 |
| 41pprof19  | 0,61 | 39,11 |
| 41pprof21  | 0,50 | 49,85 |
| 41pprof23  | 0,48 | 51,98 |
| Pt15prof1  | 0,31 | 68,59 |
| Pt15prof5  | 0,36 | 63,58 |
| Pt15prof7  | 0,49 | 50,89 |
| Pt15prof9  | 0,30 | 70,47 |
| Pt15prof11 | 0,39 | 60,84 |
| Pt15prof13 | 0,52 | 47,54 |
| Pt12prof1  | 0,33 | 67,25 |
| Pt12prof3  | 0,44 | 56,18 |
| Pt12prof5  | 0,35 | 65,27 |
| Pt12prof11 | 0,40 | 59,73 |
| Pt12prof15 | 0,45 | 55,45 |
| Pt12prof17 | 0,40 | 60,39 |
| Pt12prof19 | 0,40 | 60,31 |
| MISprof1   | 0,24 | 76,44 |
| MISprof5   | 0,23 | 77,20 |
| MISprof7   | 0,34 | 66,08 |
| MISprof13  | 0,40 | 59,63 |
| MISprof15  | 0,29 | 71,05 |
| 6extprof1  | 0,25 | 75,23 |
| 6extprof3  | 0,22 | 78,04 |
| 6extprof5  | 0,31 | 68,74 |
| 6extprof9  | 0,24 | 76,17 |
| 6extprof11 | 0,39 | 60,76 |
| 6extprof13 | 0,35 | 64,82 |
| 6extprof17 | 0,27 | 72,54 |
